# Supplementary material for: COSUTI: A Core Outcome Set (COS) for Interventions for the Treatment of Uncomplicated Urinary Tract Infection (UTI) in Adults
Source: MDPI journal article supplement (doi:10.3390/antibiotics11121846), 2022-12-19
Supplement: s1 [file s1]

## Supplementary material S1

### *Outcomes included in round 1 Delphi survey*

| No. | Domain                    | Outcome                                                                                                 | Plain English definition                                                                                                                                                                                                                                                               |
|-----|---------------------------|---------------------------------------------------------------------------------------------------------|----------------------------------------------------------------------------------------------------------------------------------------------------------------------------------------------------------------------------------------------------------------------------------------|
| 1   | <b>Treatment</b>          | The use of any antibiotic up to day 30                                                                  | The use of any antibiotics by a patient up to day 30                                                                                                                                                                                                                                   |
| 2   |                           | Use of antibiotics                                                                                      | The use of any antibiotics by a patient at any time                                                                                                                                                                                                                                    |
| 3   |                           | Duration of treatment                                                                                   | The length of time a patient's treatment (e.g. taking antibiotics) lasts                                                                                                                                                                                                               |
| 4   | <b>Clinical Cure</b>      | Clinical cure                                                                                           | No signs or symptoms of UTI                                                                                                                                                                                                                                                            |
| 5   |                           | Clinical cure by day 3 from initiation of treatment                                                     | No signs or symptoms of UTI by day 3 from when treatment was started                                                                                                                                                                                                                   |
| 6   |                           | Clinical cure by day 7 from initiation of treatment                                                     | No signs or symptoms of UTI by day 7 from when treatment was started                                                                                                                                                                                                                   |
| 7   |                           | Clinical cure by day 14 from initiation of treatment                                                    | No signs or symptoms of UTI by day 14 from when treatment was started                                                                                                                                                                                                                  |
| 8   | <b>Symptom Resolution</b> | Number of days to symptom resolution                                                                    | The number of days it takes before a patient is no longer experiencing symptoms of a UTI. Symptoms are experienced or felt by a patient themselves and suggest that they might have a UTI, for example a strong, persistent urge to pass urine or burning sensation when passing urine |
| 9   |                           | Resolution of clinical signs or symptoms                                                                | A patient is no longer showing clinical signs, or experiencing symptoms of a UTI                                                                                                                                                                                                       |
| 10  |                           | Symptom resolution on Day 3                                                                             | A patient is no longer experiencing symptoms on day 3                                                                                                                                                                                                                                  |
| 11  |                           | Symptom resolution on Day 7                                                                             | A patient is no longer experiencing symptoms on day 7                                                                                                                                                                                                                                  |
| 12  |                           | Short-term symptomatic cure: the absence of urinary symptoms up to two weeks after start of treatment.  | A patient is no longer experiencing symptoms of a UTI at any time up to two weeks after treatment has started                                                                                                                                                                          |
| 13  |                           | Long-term symptomatic cure: the absence of urinary symptoms up to eight weeks after start of treatment. | A patient is no longer experiencing symptoms of a UTI at any time up to eight weeks after treatment has started                                                                                                                                                                        |
| 14  |                           | Relative improvement in clinical UTIs signs and symptoms                                                | A patient's signs and symptoms have slightly improved to some extent                                                                                                                                                                                                                   |

|    |                      |                                                                                                          |                                                                                                                                                                                           |
|----|----------------------|----------------------------------------------------------------------------------------------------------|-------------------------------------------------------------------------------------------------------------------------------------------------------------------------------------------|
| 15 |                      | Persistence or progression of any clinical UTIs signs or symptoms or appearance of new signs or symptoms | UTI clinical signs or symptoms stay the same or get worse for a patient, or new clinical signs or symptoms of a UTI appear                                                                |
| 16 |                      | Burden of symptoms                                                                                       | How much of a problem symptoms are for a patient                                                                                                                                          |
| 17 |                      | Burden of symptoms on Day 3                                                                              | How much of a problem symptoms are for a patient on day 3                                                                                                                                 |
| 18 |                      | Burden of symptoms on Day 7                                                                              | How much of a problem symptoms are for a patient on day 7                                                                                                                                 |
| 19 |                      | Absence of pyuria                                                                                        | The absence of pus in the urine                                                                                                                                                           |
| 20 | <b>Symptoms</b>      | Duration of symptoms                                                                                     | The length of time symptoms last                                                                                                                                                          |
| 21 |                      | Duration of moderately bad symptoms                                                                      | The length of time that symptoms, that are moderately bad, last                                                                                                                           |
| 22 |                      | Duration of symptoms until little or no problem                                                          | The length of time that symptoms, that are little to no problem, last                                                                                                                     |
| 23 |                      | Symptom severity                                                                                         | How serious/ uncomfortable symptoms are                                                                                                                                                   |
| 24 |                      | Symptom severity on days 2–4                                                                             | The seriousness of symptoms on days 2- 4                                                                                                                                                  |
| 25 |                      | Changes in clinical symptoms                                                                             | A change in the symptoms experienced by a patient                                                                                                                                         |
| 26 |                      | Early symptoms by days 1 to 4                                                                            | Symptoms that occur early in the lifetime of a UTI (by days 1 to 4)                                                                                                                       |
| 27 |                      | Late symptoms by days 5 to 10                                                                            | Symptoms that occur later in the lifetime of a UTI (by days 5 to 10)                                                                                                                      |
| 28 |                      | Symptom scores, (none, mild moderate or severe)                                                          | The score given by a patient to rate how serious a symptom is for them                                                                                                                    |
| 29 |                      | Total symptom burden                                                                                     | How much discomfort the symptoms have caused a patient                                                                                                                                    |
| 30 | <b>Complications</b> | Febrile UTI                                                                                              | A UTI with the additional symptom of a high body temperature (temperature due to the UTI)                                                                                                 |
| 31 |                      | Pyelonephritis                                                                                           | One or both the kidneys become infected. The infection can be caused by bacteria or a virus                                                                                               |
| 32 |                      | Development of pyelonephritis during treatment                                                           | One or both the kidneys become infected while a patient is being treated for their UTI                                                                                                    |
| 33 |                      | Development of pyelonephritis after treatment                                                            | One or both the kidneys become infected after a patient has completed treatment for their UTI                                                                                             |
| 34 |                      | Pyelonephritis within 28 days                                                                            | One or both the kidneys become infected within 28 days                                                                                                                                    |
| 35 |                      | Episodes of suspected upper UTI                                                                          | The number of times a patient is suspected to be experiencing a UTI in the upper urinary tract (i.e., the kidneys and a tube called the ureter which connects the kidneys to the bladder) |
| 36 |                      | Complicated UTI                                                                                          | A complicated UTI is a more severe form of a UTI that has possibly extended beyond just the involvement of the bladder                                                                    |

|    |                                    |                                                                             |                                                                                                                                                                           |
|----|------------------------------------|-----------------------------------------------------------------------------|---------------------------------------------------------------------------------------------------------------------------------------------------------------------------|
| 37 |                                    | Worsening of UTI, progression to complicated UTI                            | The signs and/or symptoms of a patients UTI gets worse and leads to a complicated UTI                                                                                     |
| 38 |                                    | Urosepsis                                                                   | Where the bacteria that caused the UTI infects a person's bloodstream                                                                                                     |
| 39 |                                    | Urosepsis within 28 days                                                    | Urosepsis that develops within 28 days                                                                                                                                    |
| 40 |                                    | Other renal complications                                                   | Any other complications of the urinary system that may arise from a patient having a UTI                                                                                  |
| 41 |                                    | Septic syndrome                                                             | An infection associated with a number of other indicators or symptoms suggesting a severe infection                                                                       |
| 42 |                                    | Septicaemia                                                                 | Septicaemia is the clinical name for bacterial infection of the blood stream                                                                                              |
| 43 |                                    | Hospitalisation/hospital admissions                                         | Admission of a patient to hospital for treatment of a UTI or complications of a UTI                                                                                       |
| 44 |                                    | Need for intravenous antibiotics                                            | The need for a patient to receive antibiotics that are given directly into a vein so that they can enter the bloodstream immediately and bypass the absorption in the gut |
| 45 |                                    | Life threatening or associated with permanent disability                    | An illness that is so serious that it threatens the life of a patient, or that has the potential to cause permanent disability                                            |
| 46 |                                    | Death                                                                       | End of life                                                                                                                                                               |
| 47 | <b>Adverse treatment reactions</b> | Gastrointestinal symptoms (e.g. nausea)                                     | Symptoms, such as nausea, that are experienced by patients in the gastrointestinal tract, from the mouth to the rectum                                                    |
| 48 |                                    | Gastrointestinal haemorrhage                                                | Bleeding anywhere in tract from the mouth to the rectum                                                                                                                   |
| 49 |                                    | Vomiting                                                                    | Uncontrolled emptying of the stomach through the mouth                                                                                                                    |
| 50 |                                    | Abdominal pain                                                              | Pain experienced by a patient in the abdominal area (below the ribs and above the pelvis)                                                                                 |
| 51 |                                    | Diarrhoea                                                                   | Unwanted and frequent passing of watery or loose stool                                                                                                                    |
| 52 |                                    | Skin rash                                                                   | Skin that becomes scaly, bumpy, itchy, or otherwise irritated                                                                                                             |
| 53 |                                    | Skin findings (including severe reactions such as Stevens–Johnson syndrome) | A noticeable irregularity on a patients skin                                                                                                                              |
| 54 |                                    | Exfoliative dermatitis                                                      | Widespread redness of the skin and scaling of the skin                                                                                                                    |
| 55 |                                    | Facial skin alteration                                                      | A change to the skin on a patient's face                                                                                                                                  |
| 56 |                                    | Vaginal discomfort                                                          | Itching or irritation in the vagina                                                                                                                                       |
| 57 |                                    | Vaginitis                                                                   | Vaginitis is a word for various disorders that cause inflammation or infection of the vagina.                                                                             |
| 58 |                                    | Vaginal candidiasis                                                         | A vaginal yeast infection (vaginal candidiasis) is a fungal infection that causes irritation, discharge and intense itchiness of the vagina and the vulva                 |
| 59 |                                    | Neurological events                                                         | Events or instances that involve the central and peripheral nervous system                                                                                                |
| 60 |                                    | Headache                                                                    |                                                                                                                                                                           |

|    |                |                                                                                      |                                                                                                                    |
|----|----------------|--------------------------------------------------------------------------------------|--------------------------------------------------------------------------------------------------------------------|
| 61 |                | Light-headedness                                                                     | A feeling of dizziness or as if you might faint                                                                    |
| 62 |                | Disturbance in attention                                                             | Difficulties with attention span                                                                                   |
| 63 |                | Restlessness                                                                         | Being unable to remain still                                                                                       |
| 64 |                | Haematological event                                                                 | Events or instances that involve the blood                                                                         |
| 65 |                | Pulmonary and hepatic fibrosis                                                       | Damage and scarring to the tissue of the lung and liver                                                            |
| 66 |                | Epigastralgia                                                                        | Pain in the upper central region of the abdomen for example, heartburn or reflux                                   |
| 67 |                | Nephrotoxicity                                                                       | Toxicity (the state of being poisonous or damaging) in the kidneys                                                 |
| 68 |                | Ototoxicity                                                                          | Toxicity in the ear                                                                                                |
| 69 |                | Dyspepsia                                                                            | Indigestion                                                                                                        |
| 70 |                | Decreased appetite                                                                   | No interest in food                                                                                                |
| 71 | <b>Relapse</b> | Frequency of relapses until day 28 after initial resolution of symptoms              | How often symptoms come back or get worse in the 28 days after original symptoms had improved.                     |
| 72 |                | Relapse after initial resolution of symptoms                                         | When symptoms come back or get worse after they had originally improved.                                           |
| 73 |                | Early relapse of symptoms by day 14 after initial resolution of symptoms             | When symptoms come back or get worse within 14 days of symptoms originally improving.                              |
| 74 |                | Frequency of relapse or new infection by day 15 after initial resolution of symptoms | How often symptoms come back, get worse or a new infection begins within 15 days of symptoms originally improving. |
| 75 |                | Frequency of relapse or new infection by day 28 after initial resolution of symptoms | How often symptoms come back, get worse or a new infection begins within 28 days of symptoms originally improving. |
| 76 |                | Incidence of new symptoms of UTI after initial clinical cure                         | How often new symptoms of an infection of the urinary bladder occurs after it had originally improved              |
| 77 |                | Recurrent UTI after initial resolution of symptoms up to day 28                      | Symptoms come back or get worse within 28 days of originally improving.                                            |
| 78 |                | Recurrent UTI after initial resolution of symptoms within six and 12 months          | Symptoms come back or get worse within 6 to 12 months of originally improving.                                     |
| 79 |                | Recurrent UTI after initial resolution of symptoms 12 months                         | Symptoms come back or get worse within 12 months of originally improving.                                          |
| 80 |                | Recurrence 4– 6 weeks following treatment completion                                 | Signs or symptoms come back or get worse 4- 6 weeks after treatment is completed                                   |
| 81 |                | Clinical Recurrence of signs after initial resolution of symptoms                    | Signs come back or get worse after originally improving                                                            |
| 82 |                | Recurrence of a UTI within 6 months after initial resolution of symptoms             | Signs or symptoms come back or get worse within 6 months after originally improving                                |
| 83 |                | Clinical recurrence within 30 days                                                   | The frequency of which clinical signs of a UTI come back or get worse within 30 days                               |

|     |                                                   |                                                                                                                      |                                                                                                                                                 |
|-----|---------------------------------------------------|----------------------------------------------------------------------------------------------------------------------|-------------------------------------------------------------------------------------------------------------------------------------------------|
| 84  |                                                   | Clinical recurrence within 90 days                                                                                   | The frequency of which of clinical signs of a UTI come back or get worse within 90 days                                                         |
| 85  | <b>Failure, discontinuation and tolerance</b>     | The persistence of signs and symptoms at the post treatment visit                                                    | Signs and symptoms stay or get worse following the completion of treatment                                                                      |
| 86  |                                                   | The persistence of signs and symptoms at the post treatment visit on the first day following completion of treatment | Signs and symptoms have remained or gotten worse since completion of treatment from the first visit to the medical practitioner                 |
| 87  |                                                   | The persistence of signs and symptoms at the post treatment visit at 7 to 10 days                                    | Signs and symptoms have remained or gotten worse at the visit to the medical practitioner at 7 to 10 days following completion of treatment     |
| 88  |                                                   | The persistence of signs and symptoms at the post treatment visit at 8 weeks                                         | Signs and symptoms have remained or gotten worse at the visit to the medical practitioner at 8 weeks following completion of treatment          |
| 89  |                                                   | Number of return visits to the GP with UTI                                                                           | The number of times a patient returns to their General Practitioner (GP) for a visit due to UTI                                                 |
| 90  |                                                   | Re-consultation in 1 month with UTI                                                                                  | Repeat appointment with medical practitioner within 1 month due to UTI                                                                          |
| 91  |                                                   | Re-consultation in 3 months with UTI                                                                                 | Repeat appointments in 3 months due to UTI                                                                                                      |
| 92  |                                                   | Secondary antibiotic treatments                                                                                      | The use of a second antibiotic to treat the UTI following failure of the first antibiotic to successfully treat it                              |
| 93  |                                                   | Discontinuation of treatment                                                                                         | The decision not to continue with treatment by a medical practitioner                                                                           |
| 94  |                                                   | Treatment adherence                                                                                                  | Whether a patient complies with taking the medications that have been prescribed to them by a medical practitioner to treat a UTI               |
| 95  | <b>Quality of life &amp; Patient Satisfaction</b> | Clinical reported quality of life                                                                                    | A patient's quality of life, as reported by a trained healthcare practitioner after they observe a patient's health condition                   |
| 96  |                                                   | Patient self-reported quality of life                                                                                | A patient's quality of life, as reported by the patient themselves                                                                              |
| 97  |                                                   | Days absent from work                                                                                                | The number of days that the patient was unable to attend work due to UTI signs or symptoms                                                      |
| 98  |                                                   | Functional status                                                                                                    | An individual's ability to perform normal daily activities required to meet basic needs, fulfil usual roles, and maintain health and well-being |
| 99  |                                                   | Long-term mortality, caused by and related to UTI                                                                    | Death occurring a long period of time after but due to a patient's UTI                                                                          |
| 100 |                                                   | Mental health status                                                                                                 | The condition of a patient's mental health                                                                                                      |
| 101 |                                                   | Activity impairment on days 1-7                                                                                      | Reduction in a patient's activity in the first week                                                                                             |
| 102 |                                                   | Overall satisfaction with management of the UTI                                                                      | A patient's level of contentment or happiness with the way healthcare staff have organised the care of their UTI                                |

|     |                                                                         |                                                                                                                               |                                                                                                                                                                                                   |
|-----|-------------------------------------------------------------------------|-------------------------------------------------------------------------------------------------------------------------------|---------------------------------------------------------------------------------------------------------------------------------------------------------------------------------------------------|
| 103 |                                                                         | Patients' satisfaction with the treatment of the UTI                                                                          | A patient's level of contentment or happiness with the treatment of their UTI by their healthcare practitioners                                                                                   |
| 104 | <b>Antibiotic Resistance, Bacterial Cure &amp; Microbiological Cure</b> | Development of antibiotic resistance                                                                                          | Antibiotic resistance occurs when bacteria change in some way that reduces or stops how well drugs, chemicals, or other agents, that are designed to cure or prevent UTIs, work                   |
| 105 |                                                                         | Short-term bacteriological cure within 14 days of the start of treatment                                                      | The results of testing of a patient's urine sample at their first follow-up appointment with a medical practitioner within 14 days of the start of treatment suggests that the UTI has been cured |
| 106 |                                                                         | Long-term bacteriological cure within 30 days of the start of treatment                                                       | The results of testing of a patient's urine sample at their first follow-up appointment with a medical practitioner within 30 days of the start of treatment suggests that the UTI has been cured |
| 107 |                                                                         | Bacteraemia up to one year                                                                                                    | Bacteria is found in a patient's blood up to one year after initial presentation for UTI treatment                                                                                                |
| 108 |                                                                         | The microbiological cure rates at 5-9 days after treatment                                                                    | The number of patients whose urine tests negative for the bacteria related to UTIs 5-9 days after treatment                                                                                       |
| 109 | <b>Microbiological Relapse &amp; Microbiological Failure</b>            | microbiological recurrence within 30 days                                                                                     | The number of patients whose urine tests positive for the bacteria related to UTIs within 30 days of testing negatively                                                                           |
| 110 |                                                                         | microbiological recurrence within 90 days                                                                                     | The number of patients whose urine tests positive for the bacteria related to UTIs within 90 days of testing negatively                                                                           |
| 111 |                                                                         | Bacteriological/microbiological relapse                                                                                       | A patient who initially tested negative for the bacteria related to UTIs then experienced a growth by day-28 of that same bacteria                                                                |
| 112 |                                                                         | The persistence of causative organism in urine post treatment                                                                 | The cause of the UTI remains in a patients' urine when tested after treatment                                                                                                                     |
| 113 |                                                                         | The persistence of causative organism in urine at the post treatment visit on the first day following completion of treatment | The cause of the UTI remains in a patients' urine when tested at the visit to the medical practitioner on the first day following completion of treatment                                         |
| 114 |                                                                         | The persistence of causative organism in urine at the post treatment visit at 7 to 10 days                                    | The cause of the UTI remains in a patients' urine when tested at the visit to the medical practitioner at 7- 10 days following completion of treatment                                            |
| 115 |                                                                         | The persistence of causative organism in urine at the post treatment visit at 8 weeks                                         | The cause of the UTI remains in a patients' urine when tested at the visit to the medical practitioner at 8 weeks following completion of treatment                                               |
| 116 |                                                                         | The microbiological outcome 4–6 weeks after treatment completion demonstrated UTI recurrence.                                 | The reoccurrence of a bladder infection 4-6 weeks after treatment was completed                                                                                                                   |
